# Supplementary material for: Assessment of the Potential Contribution of the Urban Green System to the Carbon Balance of Cities
Source: Preprints.org preprint supplement (doi:10.20944/preprints202403.1789.v1), 2024-03-29
Supplement: Supplementary file 1 [file supplementary]

## Sheet: Foglio1
Tree ID	Species name	DBH (cm)	Height (m)	Crown Height (m)	Crown Width (m)	Canopy Cover (m^2)	Tree Condition	Leaf Area (m^2)	Leaf Biomass (kg)	Leaf Area Index	Basal Area (m^2)	Stratum	Carbon uptake by tree canopy cover (gr/m^2)	Carbon Sequestration (kg/yr)	Carbon Sequestration (class of performance)	Carbon Sequestration (% of total)
D1.1	Blue spruce (Picea pungens)	30.9	11.4	11.4	3.8	11	EXCELLENT	197.3	32.9	17.9	0.075	Angiosperms (arboretum)	736.364	8.1	very poor	0.215328
D1.10	Black poplar (Populus nigra)	43.6	20.6	16.9	4	12.9	FAIR	154.2	11.1	12	0.149	Angiosperms (arboretum)	992.248	12.8	poor	0.340272
D1.11	White poplar (Populus alba)	44.9	18.1	16.6	9.6	72.4	EXCELLENT	826.2	71.8	11.4	0.158	Angiosperms (arboretum)	280.387	20.3	acceptable	0.53965
D1.13	Populus canescens (Populus canescens)	54.7	16.3	8.8	9	63.6	EXCELLENT	326.6	23.6	5.1	0.235	Angiosperms (arboretum)	9.43396	0.6	null	0.0159502
D1.14	Populus canescens (Populus canescens)	48.7	12	9.8	10.1	80.1	EXCELLENT	364.3	26.3	4.5	0.186	Angiosperms (arboretum)	4.99376	0.4	null	0.0106335
D1.15	Carolina poplar (Populus x canadensis)	81	23.5	13.9	9.5	70.9	EXCELLENT	677.6	62.6	9.6	0.515	Angiosperms (arboretum)	684.062	48.5	very good	1.28931
D1.16	Carolina poplar (Populus x canadensis)	72.9	23.1	10	11.3	100.3	EXCELLENT	455.3	42.1	4.5	0.418	Angiosperms (arboretum)	413.759	41.5	good	1.10322
D1.17	Black poplar (Populus nigra)	50.1	24.1	13.8	7.7	47.2	EXCELLENT	577.8	41.7	12.2	0.197	Angiosperms (arboretum)	504.237	23.8	acceptable	0.632693
D1.18	Black poplar (Populus nigra)	86.3	24.1	12.8	13	132.7	EXCELLENT	643.7	46.4	4.8	0.585	Angiosperms (arboretum)	574.981	76.3	very good	2.02834
D1.19	Black poplar (Populus nigra)	12.1	8.7	7.3	4	12.6	EXCELLENT	59	4.3	4.7	0.012	Angiosperms (arboretum)	182.54	2.3	null	0.0611426
D1.2	Dawn redwood (Metasequoia glyptostroboides)	41.1	19.2	15.8	7.4	43	EXCELLENT	460.7	26	10.7	0.133	Angiosperms (arboretum)	293.023	12.6	poor	0.334955
D1.20	Black poplar (Populus nigra)	10.5	7.5	6	3.4	9.1	EXCELLENT	33.6	2.4	3.7	0.009	Angiosperms (arboretum)	208.791	1.9	null	0.0505091
D1.21	Corkscrew willow (Salix babylonica v. matsudana)	42	8.7	5.3	8	50.3	FAIR	193.5	12.3	3.9	0.139	Angiosperms (arboretum)	300.199	15.1	poor	0.401414
D1.22	Chinese wingnut (Pterocarya stenoptera)	20.5	5.1	5.1	2.8	6.2	FAIR	13.6	1.1	2.2	0.033	Angiosperms (arboretum)	806.452	5	null	0.132919
D1.23	Black walnut (Juglans nigra)	24.4	10.3	8	6.7	34.7	EXCELLENT	170.6	13.7	4.9	0.047	Angiosperms (arboretum)	308.357	10.7	very poor	0.284446
D1.24	Black walnut (Juglans nigra)	30.6	12.1	10.5	9.8	75.4	EXCELLENT	435.2	34.9	5.8	0.074	Angiosperms (arboretum)	196.286	14.8	poor	0.393439
D1.25	Black walnut (Juglans nigra)	41.1	15.3	13.1	9.6	71.6	EXCELLENT	554.3	44.4	7.7	0.133	Angiosperms (arboretum)	315.642	22.6	acceptable	0.600792
D1.26	European filbert (Corylus avellana)	11.9	5.7	3.5	4.2	13.9	EXCELLENT	39.9	2.8	2.9	0.011	Angiosperms (arboretum)	158.273	2.2	null	0.0584842
D1.27	European filbert (Corylus avellana)	14.2	6.2	4.2	7.1	39.6	EXCELLENT	143.1	9.9	3.6	0.016	Angiosperms (arboretum)	53.0303	2.1	null	0.0558258
D1.28	European filbert (Corylus avellana)	14	5.4	3.7	5.5	23.8	EXCELLENT	75.9	5.3	3.2	0.015	Angiosperms (arboretum)	109.244	2.6	null	0.0691177
D1.29	European filbert (Corylus avellana)	9.9	4.3	2.8	3	7.3	FAIR	14.4	1	2	0.008	Angiosperms (arboretum)	191.781	1.4	null	0.0372172
D1.3	English holly (Ilex aquifolium)	49.2	4.6	3.3	1.7	2.1	FAIR	8.7	1.2	4.1	0.19	Angiosperms (arboretum)	190.476	0.4	null	0.0106335
D1.30	European hornbeam (Carpinus betulus)	26.3	7.9	2.1	4.9	19.2	EXCELLENT	47	2.8	2.4	0.054	Angiosperms (arboretum)	578.125	11.1	very poor	0.295079
D1.31	European hornbeam (Carpinus betulus)	55.9	16.2	11.5	10.2	80.9	EXCELLENT	886.6	53.4	11	0.245	Angiosperms (arboretum)	8.65266	0.7	null	0.0186086
D1.32	Turkish hazelnut (Corylus colurna)	15.9	8.2	5.1	4.2	13.9	EXCELLENT	55.8	3.9	4	0.02	Angiosperms (arboretum)	316.547	4.4	null	0.116968
D1.33	Turkish hazelnut (Corylus colurna)	16.2	13.7	11.2	4	12.6	EXCELLENT	176	12.2	14	0.021	Angiosperms (arboretum)	285.714	3.6	null	0.0957014
D1.34	Italian alder (Alnus cordata)	48.2	19.8	12.2	8.6	58.1	EXCELLENT	613.2	44.7	10.6	0.183	Angiosperms (arboretum)	218.589	12.7	poor	0.337613
D1.35	Italian alder (Alnus cordata)	22.3	12.5	6.3	4.6	16.6	EXCELLENT	77.5	5.7	4.7	0.039	Angiosperms (arboretum)	355.422	5.9	very poor	0.156844
D1.36	Hop hornbeam (Ostrya carpinifolia)	42.2	17.2	16.2	12.3	118.8	EXCELLENT	939.5	61.3	7.9	0.14	Angiosperms (arboretum)	126.263	15	poor	0.398756
D1.37	Hop hornbeam (Ostrya carpinifolia)	28.2	17.7	10.9	7.3	41.3	EXCELLENT	362.8	23.7	8.8	0.062	Angiosperms (arboretum)	205.811	8.5	very poor	0.225962
D1.38	Hop hornbeam (Ostrya carpinifolia)	30.3	13.9	11.9	7.4	43.6	EXCELLENT	405.2	26.5	9.3	0.072	Angiosperms (arboretum)	215.596	9.4	very poor	0.249887
D1.39	Hop hornbeam (Ostrya carpinifolia)	17.8	13.4	12.4	5.5	23.8	EXCELLENT	233.3	15.2	9.8	0.025	Angiosperms (arboretum)	184.874	4.4	null	0.116968
D1.4	Corkscrew willow (Salix babylonica v. matsudana)	13.4	13.4	11.9	12.7	125.7	GOOD	246.6	15.6	2	0.014	Angiosperms (arboretum)	51.7104	6.5	very poor	0.172794
D1.40	European beech (Fagus sylvatica)	25	14	10.3	5.6	24.6	EXCELLENT	253.6	12.7	10.3	0.049	Angiosperms (arboretum)	239.837	5.9	very poor	0.156844
D1.41	European beech (Fagus sylvatica)	51.6	15.9	13.6	9.4	69.4	EXCELLENT	787.2	39.4	11.3	0.209	Angiosperms (arboretum)	280.98	19.5	acceptable	0.518383
D1.42	European beech (Fagus sylvatica)	43.4	15.2	12.4	9.9	77.8	EXCELLENT	529.5	26.5	6.8	0.148	Angiosperms (arboretum)	200.514	15.6	poor	0.414706
D1.43	European beech (Fagus sylvatica)	24	11.6	8.8	7.5	43.6	EXCELLENT	271.9	13.6	6.2	0.045	Angiosperms (arboretum)	128.44	5.6	very poor	0.148869
D1.44	European beech (Fagus sylvatica)	55.4	16.2	12.8	10.2	80.9	EXCELLENT	746	37.3	9.2	0.241	Angiosperms (arboretum)	208.9	16.9	poor	0.449265
D1.45	English oak (Quercus robur)	49	15.9	11.1	9.6	72.4	EXCELLENT	390.4	26	5.4	0.189	Angiosperms (arboretum)	303.867	22	acceptable	0.584842
D1.46	Downy oak (Quercus pubescens)	38.2	15	12.7	10.6	88.2	EXCELLENT	461.4	45.3	5.2	0.115	Angiosperms (arboretum)	183.673	16.2	poor	0.430656
D1.47	English oak (Quercus robur)	52.6	15.5	11.3	9.4	70.1	EXCELLENT	404.5	26.9	5.8	0.217	Angiosperms (arboretum)	336.662	23.6	acceptable	0.627376
D1.48	English oak (Quercus robur)	53.2	15.3	10	11.2	97.6	EXCELLENT	406	27	4.2	0.222	Angiosperms (arboretum)	244.877	23.9	acceptable	0.635351
D1.49	European turkey oak (Quercus cerris)	50.3	20.7	15.3	12.1	115	EXCELLENT	789.8	77.6	6.9	0.199	Angiosperms (arboretum)	189.565	21.8	acceptable	0.579525
D1.5	Large gray willow (Salix cinerea)	11.4	4.3	3.8	3.1	7.8	GOOD	20.6	1.3	2.6	0.01	Angiosperms (arboretum)	384.615	3	null	0.0797512
D1.50	European turkey oak (Quercus cerris)	64.9	14	10.1	9.2	65.8	GOOD	452.4	44.5	6.9	0.331	Angiosperms (arboretum)	455.927	30	good	0.797512
D1.51	Holly oak (Quercus ilex)	32.8	15.4	15.4	6.9	37.9	EXCELLENT	541.3	53.2	14.3	0.085	Angiosperms (arboretum)	324.538	12.3	poor	0.32698
D1.52	Holly oak (Quercus ilex)	37.2	15	15	6.8	35.8	EXCELLENT	446.7	43.9	12.5	0.109	Angiosperms (arboretum)	513.966	18.4	poor	0.489141
D1.53	Holly oak (Quercus ilex)	44.4	15.2	14.7	7.4	43	EXCELLENT	567.8	55.8	13.2	0.155	Angiosperms (arboretum)	537.209	23.1	acceptable	0.614084
D1.54	Holly oak (Quercus ilex)	72.5	10.9	10.9	11.7	106.6	EXCELLENT	587.5	57.7	5.5	0.413	Angiosperms (arboretum)	399.625	42.6	good	1.13247
D1.55	Holly oak (Quercus ilex)	39.5	14.5	14.5	8.5	56.1	EXCELLENT	793.6	78	14.2	0.123	Angiosperms (arboretum)	354.724	19.9	acceptable	0.529016
D1.56	Downy oak (Quercus pubescens)	45.2	16	14.7	9.8	75.4	EXCELLENT	783.7	77	10.4	0.161	Angiosperms (arboretum)	253.316	19.1	poor	0.507749
D1.59	Pecan (Carya illinoinensis)	61.9	16.1	14.5	13.3	138.9	EXCELLENT	694.3	48.3	5	0.301	Angiosperms (arboretum)	182.865	25.4	acceptable	0.675227
D1.6	Purpleosier willow (Salix purpurea)	9.5	5.3	5.3	6.2	30.2	EXCELLENT	88.9	5.6	2.9	0.007	Angiosperms (arboretum)	102.649	3.1	null	0.0824095
D1.60	Oneseed hawthorn (Crataegus monogyna)	13.7	6.6	3.2	4.7	17.3	EXCELLENT	46.1	5.8	2.7	0.015	Angiosperms (arboretum)	190.751	3.3	null	0.0877263
D1.7	White poplar (Populus alba)	54.7	21.4	13.4	10.4	85.8	EXCELLENT	502	43.6	5.9	0.235	Angiosperms (arboretum)	315.851	27.1	acceptable	0.720419
D1.8	Black poplar (Populus nigra)	35.3	21.8	19.5	4.4	15.2	EXCELLENT	185	13.3	12.2	0.098	Angiosperms (arboretum)	736.842	11.2	very poor	0.297738
D1.9	White poplar (Populus alba)	54.7	21.2	16.7	13.6	144.2	EXCELLENT	898.8	78.2	6.2	0.235	Angiosperms (arboretum)	187.933	27.1	acceptable	0.720419
D2.1	Pecan (Carya illinoinensis)	56.8	20	18.8	13.5	143.1	EXCELLENT	1143	79.5	8	0.253	Angiosperms (arboretum)	157.233	22.5	acceptable	0.598134
D2.10	European hackberry (Celtis australis)	38.5	12.2	5.1	7.5	44.8	EXCELLENT	236.2	13.9	5.3	0.116	Angiosperms (arboretum)	62.5	2.8	null	0.0744344
D2.11	Hedge maple (Acer campestre)	30	11.9	11.4	9.7	73.9	EXCELLENT	364.6	20.5	4.9	0.071	Angiosperms (arboretum)	108.254	8	very poor	0.21267
D2.13	European beech (Fagus sylvatica)	68.3	13.4	11.8	10.2	80.9	EXCELLENT	573	28.7	7.1	0.366	Angiosperms (arboretum)	212.608	17.2	poor	0.45724
D2.14	Balearic boxwood (Buxus balearica)	14.6	5	5	3.2	7.8	EXCELLENT	25.7	4.6	3.3	0.017	Angiosperms (arboretum)	1307.69	10.2	very poor	0.271154
D2.17	Common fig (Ficus carica)	32.3	5.9	5.1	6.9	37.4	EXCELLENT	179.4	14	4.8	0.082	Angiosperms	534.759	20	acceptable	0.531675
D2.2	Pecan (Carya illinoinensis)	47.4	19.3	16.4	11.6	104.8	EXCELLENT	907.1	63.1	8.7	0.177	Angiosperms (arboretum)	166.031	17.4	poor	0.462557
D2.3	Siberian elm (Ulmus pumila)	54.7	16.1	13.1	13.7	146.3	EXCELLENT	577.1	39.3	3.9	0.235	Angiosperms (arboretum)	209.159	30.6	good	0.813462
D2.4	Paper mulberry (Broussonetia papyrifera)	8.6	3.5	2.8	4	12.6	EXCELLENT	24.9	1.4	2	0.006	Angiosperms (arboretum)	206.349	2.6	null	0.0691177
D2.5	Red mulberry (Morus rubra)	7.3	4.8	2.8	2.9	6.6	EXCELLENT	13.1	1.3	2	0.004	Angiosperms (arboretum)	424.242	2.8	null	0.0744344
D2.7	Osage orange (Maclura pomifera)	59.5	14.9	13.7	14.2	158.4	FAIR	599.8	60.3	3.8	0.278	Angiosperms (arboretum)	8.20707	1.3	null	0.0345588
D2.9	European hackberry (Celtis australis)	60.2	14.6	11	12.2	116.9	EXCELLENT	601	35.4	5.1	0.285	Angiosperms (arboretum)	33.3618	3.9	null	0.103677
D3.1	Tulip tree (Liriodendron tulipifera)	37.6	8.9	6.2	6.4	32.2	EXCELLENT	215.1	12.7	6.7	0.111	Angiosperms	739.13	23.8	acceptable	0.632693
D3.4	Tulip tree (Liriodendron tulipifera)	39.8	9.5	6.3	5.5	23.3	EXCELLENT	166	9.8	7.1	0.124	Angiosperms	1107.3	25.8	acceptable	0.68586
D3.5	Tulip tree (Liriodendron tulipifera)	29	6.2	5	5.1	20	EXCELLENT	102.9	6.1	5.1	0.066	Angiosperms	575	11.5	very poor	0.305713
D3.6	Tulip tree (Liriodendron tulipifera)	43.9	15.1	13	6.9	37.4	EXCELLENT	616.7	36.4	16.5	0.151	Angiosperms	791.444	29.6	good	0.786878
D3.7	Bay laurel (Laurus nobilis)	4.7	2	2	2.7	5.7	EXCELLENT	9.2	0.5	1.6	0.002	Angiosperms	403.509	2.3	null	0.0611426
D4.1	Oriental planetree (Platanus orientalis)	33.6	11.6	8.4	9.8	74.7	EXCELLENT	467.7	21.5	6.3	0.089	Angiosperms	191.432	14.3	poor	0.380147
D4.10	Dog rose (Rosa canina)	5.9	2.1	1.7	2.2	3.8	EXCELLENT	5.2	0.4	1.4	0.003	Angiosperms	552.632	2.1	null	0.0558258
D4.11	Dog rose (Rosa canina)	5.2	3.5	2.7	3.5	9.9	EXCELLENT	14.1	1.1	1.4	0.002	Angiosperms	272.727	2.7	null	0.0717761
D4.2	Oriental planetree (Platanus orientalis)	35	16.4	14	7.7	47.2	EXCELLENT	541.4	24.9	11.5	0.096	Angiosperms	222.458	10.5	very poor	0.279129
D4.21	Sweet mock orange (Philadelphus coronarius)	3	2.5	2	1.8	2.5	EXCELLENT	3.8	0.3	1.5	0.001	Angiosperms	480	1.2	null	0.0319005
D4.3	Oriental planetree (Platanus orientalis)	41.4	15.6	12	9.4	69.4	EXCELLENT	525.1	24.1	7.6	0.135	Angiosperms	194.524	13.5	poor	0.35888
D4.4	Oriental planetree (Platanus orientalis)	39.3	16.4	13	7.9	49	EXCELLENT	593	27.2	12.1	0.121	Angiosperms	255.102	12.5	poor	0.332297
D4.5	Oriental planetree (Platanus orientalis)	56.8	17.3	15.7	12.1	115.9	EXCELLENT	1223.2	56.2	10.5	0.253	Angiosperms	264.021	30.6	good	0.813462
D4.6	Japanese pittosporum (Pittosporum tobira)	4.3	2.4	2.4	2.9	6.6	EXCELLENT	9.6	0.7	1.5	0.001	Angiosperms	90.9091	0.6	null	0.0159502
D4.7	Apricot (Prunus armeniaca)	35	3.2	1.6	4.8	18.1	EXCELLENT	29.8	2.3	1.6	0.096	Angiosperms	1464.09	26.5	acceptable	0.704469
D4.8	Blackthorn (Prunus spinosa)	4.7	2.8	2.3	2.6	5.5	EXCELLENT	7.8	0.6	1.4	0.002	Angiosperms	218.182	1.2	null	0.0319005
D4.9	Lebanese wild apple (Eriolobus trilobatus)	4.6	4.9	3.7	1.4	1.7	EXCELLENT	5.1	0.4	3.1	0.002	Angiosperms	1352.94	2.3	null	0.0611426
D5.1	Sweet almond (Prunus dulcis)	16	5.7	3.8	2.5	5.1	EXCELLENT	16.2	1.6	3.2	0.02	Angiosperms	1941.18	9.9	very poor	0.263179
D5.15	Arbol de judea (Cercis siliquastrum)	7.2	3	2.2	2.6	5.1	EXCELLENT	7.9	0.5	1.5	0.004	Angiosperms	568.627	2.9	null	0.0770928
D5.16	Golden-chain tree (Laburnum anagyroides)	2.8	2.5	1.7	1.6	1.9	EXCELLENT	2.7	0.2	1.5	0.001	Angiosperms	894.737	1.7	null	0.0451923
D5.17	Desert false indigo (Amorpha fruticosa)	5.4	2.2	2.2	2.4	4.5	EXCELLENT	6.5	0.6	1.4	0.002	Angiosperms	755.556	3.4	null	0.0903847
D5.18	Pagoda tree (Styphnolobium japonicum)	18.5	2.8	0.8	2.3	4	EXCELLENT	5.2	0.6	1.3	0.027	Angiosperms	3150	12.6	poor	0.334955
D5.19	Pagoda tree (Styphnolobium japonicum)	8.8	2.7	0.7	1.9	2.7	EXCELLENT	3.5	0.4	1.3	0.006	Angiosperms	1703.7	4.6	null	0.122285
D5.20	Pagoda tree (Styphnolobium japonicum)	7.3	4.5	2.7	1.9	2.8	EXCELLENT	4.8	0.5	1.7	0.004	Angiosperms	1321.43	3.7	null	0.0983598
D5.22	White lead tree (Leucaena leucocephala)	5.1	1.8	1.2	1.6	2	EXCELLENT	3.1	0.3	1.5	0.002	Angiosperms	1100	2.2	null	0.0584842
D5.23	Carob (Ceratonia siliqua)	6.9	2	1.4	1.3	1.2	EXCELLENT	3.1	0.3	2.5	0.004	Angiosperms	1500	1.8	null	0.0478507
D5.25	Japanese wisteria (Wisteria floribunda)	12.4	2.8	1.5	1.4	1.7	EXCELLENT	4.2	0.4	2.5	0.012	Angiosperms	5647.06	9.6	very poor	0.255204
D5.26	Purple wisteria (Wisteria sinensis)	6.7	2.6	1.7	4	12.9	EXCELLENT	15.2	1.3	1.2	0.003	Angiosperms	170.543	2.2	null	0.0584842
D5.27	Honeylocust (Gleditsia triacanthos)	18.6	7.5	5.8	7.2	40.7	EXCELLENT	160.3	16.8	3.9	0.027	Angiosperms	245.7	10	very poor	0.265837
D5.28	Hardy orange (Poncirus trifoliata)	6	1.9	1.5	1.1	1	EXCELLENT	3.1	0.4	3	0.003	Angiosperms	3600	3.6	null	0.0957014
D5.29	Hardy orange (Poncirus trifoliata)	9	2	1.8	1.1	1	EXCELLENT	3.4	0.5	3.5	0.006	Angiosperms	6100	6.1	very poor	0.162161
D5.3	Quince (Cydonia oblonga)	19.7	3.4	3.4	3.2	8	EXCELLENT	22	1.7	2.7	0.03	Angiosperms	2087.5	16.7	poor	0.443948
D5.33	Common prickly ash (Zanthoxylum americanum)	5.5	4.1	2.9	2.1	3.5	EXCELLENT	6.4	0.9	1.9	0.002	Angiosperms	428.571	1.5	null	0.0398756
D5.34	Chinaberry (Melia azedarach)	22	4.9	3	3.8	11.6	EXCELLENT	22.1	1.6	1.9	0.038	Angiosperms	741.379	8.6	very poor	0.22862
D5.35	Goldenrain tree (Koelreuteria paniculata)	11.5	3.4	2.2	3.5	9.6	EXCELLENT	21.4	1.7	2.2	0.01	Angiosperms	385.417	3.7	null	0.0983598
D5.38	Narrow-leafed ash (Fraxinus angustifolia)	32.1	12.3	10.5	5.8	26.4	EXCELLENT	395.1	28.1	15	0.081	Angiosperms	344.697	9.1	very poor	0.241912
D5.39	Narrow-leafed ash (Fraxinus angustifolia)	49.7	17.8	16.8	11.3	101.2	EXCELLENT	1545	110	15.3	0.194	Angiosperms	232.213	23.5	acceptable	0.624718
D5.40	Flowering ash (Fraxinus ornus)	31.5	18.7	17	8.3	54.1	EXCELLENT	829.8	59.1	15.3	0.078	Angiosperms	92.4214	5	null	0.132919
D5.41	European ash (Fraxinus excelsior)	17.3	4.6	2.8	4.8	17.7	EXCELLENT	54.7	5.8	3.1	0.024	Angiosperms	451.977	8	very poor	0.21267
D5.42	Narrow-leafed ash (Fraxinus angustifolia)	50.9	15.4	13.9	9.5	70.9	EXCELLENT	826.9	58.9	11.7	0.204	Angiosperms	334.274	23.7	acceptable	0.630034
D5.43	Narrow-leafed ash (Fraxinus angustifolia)	26.1	7	4.9	3.5	9.6	FAIR	34.1	2.4	3.5	0.054	Angiosperms	468.75	4.5	null	0.119627
D5.44	Common privet (Ligustrum vulgare)	8.9	2.5	1.3	3.1	7.5	FAIR	9.5	0.9	1.3	0.006	Angiosperms	320	2.4	null	0.0638009
D5.45	Poet's jasmine (Jasminum officinale)	5.7	2.6	2.3	2.4	4.5	EXCELLENT	9.3	0.7	2	0.003	Angiosperms	600	2.7	null	0.0717761
D5.46	Poet's jasmine (Jasminum officinale)	5.1	1.9	1.5	1.5	1.8	EXCELLENT	4.3	0.3	2.4	0.002	Angiosperms	833.333	1.5	null	0.0398756
D5.47	Poet's jasmine (Jasminum officinale)	6.3	2.6	2.6	2	3.3	EXCELLENT	8.4	0.7	2.5	0.003	Angiosperms	909.091	3	null	0.0797512
D5.50	Common lilac (Syringa vulgaris)	4.5	2.2	2.2	1.6	1.9	EXCELLENT	5	0.5	2.7	0.002	Angiosperms	1052.63	2	null	0.0531675
D5.53	Broad-leaved phillyrea (Phillyrea latifolia)	38.2	6.1	4.2	8.7	58.8	EXCELLENT	275.5	21.4	4.7	0.115	Angiosperms	190.476	11.2	very poor	0.297738
D5.55	Winter jasmine (Jasminum nudiflorum)	9.2	3.5	3.5	4.2	13.9	EXCELLENT	35.6	2.8	2.6	0.007	Angiosperms	309.353	4.3	null	0.11431
D5.56	Broad-leaved phillyrea (Phillyrea latifolia)	7.8	2.8	1.6	3.6	10.2	EXCELLENT	17	1.3	1.7	0.005	Angiosperms	254.902	2.6	null	0.0691177
D5.6	Japanese flowering cherry (Prunus serrulata)	3.8	3.3	2.6	1.4	1.5	EXCELLENT	2.7	0.2	1.8	0.001	Angiosperms	1000	1.5	null	0.0398756
D5.9	Sweet cherry (Prunus avium)	8.1	6.1	4.9	3	7.1	EXCELLENT	20.6	1.6	2.9	0.005	Angiosperms	464.789	3.3	null	0.0877263
D6.1	California peppertree (Schinus molle)	7.6	2.5	1.1	2.3	4	EXCELLENT	7.2	0.7	1.8	0.004	Angiosperms	950	3.8	null	0.101018
D6.10	Glossy privet (Ligustrum lucidum)	23.2	10.3	6.4	3.7	10.5	EXCELLENT	70	6.4	6.7	0.042	Angiosperms	552.381	5.8	very poor	0.154186
D6.11	Glossy privet (Ligustrum lucidum)	32.5	10.3	7.8	6.2	29.7	EXCELLENT	236.5	21.5	8	0.083	Angiosperms	296.296	8.8	very poor	0.233937
D6.12	Glossy privet (Ligustrum lucidum)	42.1	9.7	6.6	8.3	53.5	EXCELLENT	359.7	32.7	6.7	0.139	Angiosperms	285.981	15.3	poor	0.406731
D6.13	European filbert (Corylus avellana)	5.9	3.8	3.8	4.4	14.9	EXCELLENT	35.4	2.5	2.4	0.003	Angiosperms	67.1141	1	null	0.0265837
D6.14	Black locust (Robinia pseudoacacia)	21.3	13.1	7.6	6.4	32.7	EXCELLENT	163	8.8	5	0.036	Angiosperms	223.242	7.3	very poor	0.194061
D6.15	Black locust (Robinia pseudoacacia)	27.4	12.6	6.9	7.3	42.4	EXCELLENT	201.7	10.9	4.8	0.059	Angiosperms	316.038	13.4	poor	0.356222
D6.16	Black locust (Robinia pseudoacacia)	25.1	13.2	8.8	6.1	29.2	EXCELLENT	189.2	10.2	6.5	0.049	Angiosperms	582.192	17	poor	0.451923
D6.17	Osage orange (Maclura pomifera)	5.4	5.6	4	3.3	8.6	EXCELLENT	15.9	1.6	1.9	0.002	Angiosperms	209.302	1.8	null	0.0478507
D6.18	Osage orange (Maclura pomifera)	5.1	5.8	4.1	4.7	17	EXCELLENT	32.9	3.3	1.9	0.002	Angiosperms	100	1.7	null	0.0451923
D6.19	Common fig (Ficus carica)	33.4	6	5	8.3	53.5	EXCELLENT	255.4	20	4.8	0.088	Angiosperms	362.617	19.4	acceptable	0.515724
D6.20	Italian Buckthorn (Rhamnus alaternus)	4.2	3	2.5	2	3.1	EXCELLENT	6	0.3	1.9	0.001	Angiosperms	387.097	1.2	null	0.0319005
D6.21	Italian Buckthorn (Rhamnus alaternus)	4.6	3.4	3	1.7	2.3	EXCELLENT	5.9	0.3	2.6	0.002	Angiosperms	478.261	1.1	null	0.0292421
D6.22	Italian Buckthorn (Rhamnus alaternus)	4.3	2.5	2.5	2	3	EXCELLENT	5.9	0.3	2	0.001	Angiosperms	333.333	1	null	0.0265837
D6.23	Japanese privet (Ligustrum japonicum)	8.2	3.7	2.5	2.1	3.6	EXCELLENT	7.3	0.7	2	0.005	Angiosperms	583.333	2.1	null	0.0558258
D6.24	Japanese privet (Ligustrum japonicum)	7.3	3.8	2.6	1.7	2.3	EXCELLENT	5.9	0.5	2.6	0.004	Angiosperms	1043.48	2.4	null	0.0638009
D6.25	Laurustinus (Viburnum tinus)	4.4	2.6	2.6	2	3.1	EXCELLENT	6.1	0.3	1.9	0.001	Angiosperms	290.323	0.9	null	0.0239254
D6.26	Laurustinus (Viburnum tinus)	4.2	2.4	2.4	1.2	1.2	EXCELLENT	3.6	0.2	2.9	0.001	Angiosperms	666.667	0.8	null	0.021267
D6.27	Laurustinus (Viburnum tinus)	4.5	2.5	2.5	1.3	1.4	EXCELLENT	4.1	0.2	2.8	0.002	Angiosperms	642.857	0.9	null	0.0239254
D6.28	Laurustinus (Viburnum tinus)	6.5	2.1	2.1	1.4	1.5	EXCELLENT	4.3	0.2	2.8	0.003	Angiosperms	866.667	1.3	null	0.0345588
D6.29	Laurustinus (Viburnum tinus)	3.8	2.1	2.1	1.3	1.2	EXCELLENT	3.2	0.2	2.6	0.001	Angiosperms	916.667	1.1	null	0.0292421
D6.3	Hedge maple (Acer campestre)	5.3	4	4	2.2	3.8	EXCELLENT	11.8	0.7	3.1	0.002	Angiosperms	342.105	1.3	null	0.0345588
D6.30	Laurustinus (Viburnum tinus)	3.5	2.1	2.1	1.1	0.9	EXCELLENT	2.8	0.1	3.2	0.001	Angiosperms	777.778	0.7	null	0.0186086
D6.31	Laurustinus (Viburnum tinus)	3.6	2.5	2.5	1	0.8	EXCELLENT	2.6	0.1	3.4	0.001	Angiosperms	875	0.7	null	0.0186086
D6.32	Laurustinus (Viburnum tinus)	4.5	2.4	2.4	1	0.8	EXCELLENT	2.9	0.1	3.6	0.002	Angiosperms	1125	0.9	null	0.0239254
D6.34	Laurustinus (Viburnum tinus)	3.9	2.4	2.4	1	0.8	EXCELLENT	2.7	0.1	3.5	0.001	Angiosperms	1000	0.8	null	0.021267
D6.36	Laurustinus (Viburnum tinus)	4.8	2.4	2.4	1.2	1.1	EXCELLENT	3.7	0.2	3.3	0.002	Angiosperms	909.091	1	null	0.0265837
D6.37	Laurustinus (Viburnum tinus)	3.4	2.4	2.4	1.3	1.3	EXCELLENT	3.5	0.2	2.6	0.001	Angiosperms	538.462	0.7	null	0.0186086
D6.4	Staghorn sumac (Rhus typhina)	4.2	2.5	1	1.9	2.8	EXCELLENT	4.2	0.4	1.5	0.001	Angiosperms	392.857	1.1	null	0.0292421
D6.40	Laurustinus (Viburnum tinus)	3.4	2.4	2.4	1.2	1.1	EXCELLENT	3.3	0.2	2.9	0.001	Angiosperms	636.364	0.7	null	0.0186086
D6.41	Laurustinus (Viburnum tinus)	4.6	2.4	2.4	1.6	1.9	EXCELLENT	4.5	0.2	2.4	0.002	Angiosperms	736.842	1.4	null	0.0372172
D6.42	Italian Buckthorn (Rhamnus alaternus)	4.7	3	2.5	1.5	1.8	EXCELLENT	4.7	0.2	2.6	0.002	Angiosperms	833.333	1.5	null	0.0398756
D6.5	Mastic tree (Pistacia lentiscus)	2.5	2	2	2.5	4.9	EXCELLENT	7.1	0.7	1.4	0	Angiosperms	122.449	0.6	null	0.0159502
D6.6	Flowering ash (Fraxinus ornus)	8.3	4.1	4.1	3.4	9.3	EXCELLENT	27.6	2	3	0.005	Angiosperms	118.28	1.1	null	0.0292421
D6.7	Red gum eucalyptus (Eucalyptus camaldulensis)	50	18.1	8.7	9.4	69.4	GOOD	529.5	73.3	7.6	0.196	Angiosperms	871.758	60.5	very good	1.60832
D6.8	Glossy privet (Ligustrum lucidum)	15.7	6.4	4.8	3.7	10.8	EXCELLENT	44.6	4.1	4.1	0.019	Angiosperms	398.148	4.3	null	0.11431
D6.9	Glossy privet (Ligustrum lucidum)	29.9	9.2	6.8	6.4	31.7	EXCELLENT	208.9	19	6.6	0.07	Angiosperms	312.303	9.9	very poor	0.263179
D6fr.13	Sweet cherry (Prunus avium)	5.1	4.9	2.9	2.1	3.6	EXCELLENT	6.1	0.5	1.7	0.002	Angiosperms	500	1.8	null	0.0478507
D6fr.15	Common fig (Ficus carica)	13.1	3.4	1.9	3.3	8.3	EXCELLENT	13.4	1.1	1.6	0.013	Angiosperms	783.133	6.5	very poor	0.172794
D6fr.17	Common fig (Ficus carica)	19.7	5.9	4.9	6.8	35.8	EXCELLENT	115	9	3.2	0.03	Angiosperms	217.877	7.8	very poor	0.207353
D6fra.1	Common pear (Pyrus communis)	6.6	2	0.8	1.4	1.5	EXCELLENT	1.7	0.1	1.1	0.003	Angiosperms	1400	2.1	null	0.0558258
D6fra.10	Common plum (Prunus domestica)	17.1	3.6	1.6	3.1	7.5	EXCELLENT	13.5	1	1.8	0.023	Angiosperms	1000	7.5	very poor	0.199378
D6fra.11	Common plum (Prunus domestica)	20.2	3.3	1.9	3	6.8	EXCELLENT	14.1	1.1	2.1	0.032	Angiosperms	1397.06	9.5	very poor	0.252545
D6fra.12	Apricot (Prunus armeniaca)	19.1	3.8	2	4	12.6	EXCELLENT	24.4	1.9	1.9	0.029	Angiosperms	841.27	10.6	very poor	0.281787
D6fra.2	Common pear (Pyrus communis)	9.5	3	1.6	2.3	4.2	EXCELLENT	5.6	0.4	1.4	0.007	Angiosperms	809.524	3.4	null	0.0903847
D6fra.3	Common pear (Pyrus communis)	9.2	2.2	0.7	1.8	2.4	EXCELLENT	3.5	0.3	1.5	0.007	Angiosperms	1375	3.3	null	0.0877263
D6fra.4	Common pear (Pyrus communis)	6.3	3	1.4	1.1	1	EXCELLENT	2.6	0.2	2.5	0.003	Angiosperms	2900	2.9	null	0.0770928
D6fra.5	Common pear (Pyrus communis)	9.8	3.4	1.8	1.9	3	EXCELLENT	4.6	0.3	1.5	0.008	Angiosperms	1200	3.6	null	0.0957014
D6fra.6	Common apple (Malus domestica)	14.3	3.5	2	3.3	8.8	EXCELLENT	16.2	1.4	1.8	0.016	Angiosperms	511.364	4.5	null	0.119627
D6fra.7	Common apple (Malus domestica)	12	3	1.6	3	6.8	EXCELLENT	11.2	1	1.6	0.011	Angiosperms	514.706	3.5	null	0.093043
D6fra.8	Common apple (Malus domestica)	8.6	2.9	1.2	2.2	4	EXCELLENT	6.1	0.5	1.5	0.006	Angiosperms	550	2.2	null	0.0584842
D6fra.9	Common apple (Malus domestica)	11.8	3.6	2.5	3.8	11	EXCELLENT	19	1.6	1.7	0.011	Angiosperms	309.091	3.4	null	0.0903847
D7.1	Balearic boxwood (Buxus balearica)	9.5	3.6	3.6	1.5	1.8	EXCELLENT	5.5	1	3.1	0.007	Angiosperms	2833.33	5.1	null	0.135577
D7.10	Thorny olive (Elaeagnus pungens)	7.2	2.6	2.6	1.7	2.1	EXCELLENT	6.1	0.3	2.8	0.004	Angiosperms	904.762	1.9	null	0.0505091
D7.11	Thorny olive (Elaeagnus pungens)	6.9	2.9	2.9	1.8	2.4	EXCELLENT	6.9	0.4	2.9	0.004	Angiosperms	750	1.8	null	0.0478507
D7.12	Seabuckthorn (Hippophae rhamnoides)	5.8	2.8	1.8	2.2	3.6	EXCELLENT	6.2	0.3	1.7	0.003	Angiosperms	805.556	2.9	null	0.0770928
D7.14	Common crapemyrtle (Lagerstroemia indica)	11.4	3.2	2.4	1.8	2.7	EXCELLENT	6.5	0.8	2.4	0.01	Angiosperms	1740.74	4.7	null	0.124944
D7.15	Common crapemyrtle (Lagerstroemia indica)	7.5	2.9	1.4	1.1	1	EXCELLENT	2.7	0.4	2.9	0.004	Angiosperms	2800	2.8	null	0.0744344
D7.16	Common crapemyrtle (Lagerstroemia indica)	7.2	3	0.6	1.1	1	EXCELLENT	1.2	0.2	1.2	0.004	Angiosperms	2600	2.6	null	0.0691177
D7.17	Common crapemyrtle (Lagerstroemia indica)	12	3.4	2.4	1.8	2.7	EXCELLENT	6.6	0.9	2.5	0.011	Angiosperms	1888.89	5.1	null	0.135577
D7.18	Feijoa (Acca sellowiana)	7.3	2.5	2.5	2.9	6.4	EXCELLENT	8.2	1.1	1.3	0.004	Angiosperms	421.875	2.7	null	0.0717761
D7.19	Cider gum eucalyptus (Eucalyptus gunnii)	10.3	5.7	3.6	3.1	7.3	EXCELLENT	17	2.2	2.3	0.008	Angiosperms	1178.08	8.6	very poor	0.22862
D7.20	Myrtle (Myrtus communis)	3.3	2	2	2.4	4.3	EXCELLENT	5.8	0.8	1.3	0.001	Angiosperms	441.86	1.9	null	0.0505091
D7.21	Myrtle (Myrtus communis)	3.5	1.8	1.8	2.5	4.9	EXCELLENT	6.1	0.8	1.2	0.001	Angiosperms	265.306	1.3	null	0.0345588
D7.22	Pomegranate (Punica granatum)	3.4	2.5	2.5	2.1	3.5	EXCELLENT	5.3	0.7	1.5	0.001	Angiosperms	314.286	1.1	null	0.0292421
D7.23	Pomegranate (Punica granatum)	9	1.9	1.9	1.9	2.8	EXCELLENT	5.8	0.7	2	0.006	Angiosperms	1785.71	5	null	0.132919
D7.25	Bloodtwig dogwood (Cornus sanguinea)	3.4	1.9	1.9	1.9	2.8	EXCELLENT	3.6	0.2	1.3	0.001	Angiosperms	428.571	1.2	null	0.0319005
D7.26	Himalayan Strawberry Tree (Cornus capitata)	4.8	2.3	2.2	2.3	4	EXCELLENT	5.5	0.3	1.4	0.002	Angiosperms	400	1.6	null	0.042534
D7.31	Oleander (Nerium oleander)	3.7	2	2	1.7	2.4	EXCELLENT	3.5	0.5	1.4	0.001	Angiosperms	750	1.8	null	0.0478507
D7.35	Royal paulownia (Paulownia tomentosa)	3.5	2.4	1.3	1.4	1.5	EXCELLENT	2.9	0.2	1.9	0.001	Angiosperms	533.333	0.8	null	0.021267
D7.38	Chaste tree (Vitex agnus-castus)	3.4	2.5	2.5	2.7	5.7	EXCELLENT	6.5	0.9	1.1	0.001	Angiosperms	245.614	1.4	null	0.0372172
D7.41	Mahaleb Cherry (Prunus mahaleb)	60.2	9.4	7.7	12	114	EXCELLENT	488.2	37.8	4.3	0.285	Angiosperms	12.2807	1.4	null	0.0372172
D7.42	European filbert (Corylus avellana)	9.6	4.8	3.8	3.1	7.3	EXCELLENT	22.7	1.6	3.1	0.007	Angiosperms	232.877	1.7	null	0.0451923
D7.43	European filbert (Corylus avellana)	11.5	4.9	3.3	5.6	24.6	EXCELLENT	69	4.8	2.8	0.01	Angiosperms	85.3659	2.1	null	0.0558258
D7.44	European filbert (Corylus avellana)	21.7	7.7	5.9	5.8	26.9	EXCELLENT	143.4	10	5.3	0.037	Angiosperms	241.636	6.5	very poor	0.172794
D7.45	European filbert (Corylus avellana)	15.5	6.5	4.7	6.3	31.2	EXCELLENT	122.7	8.5	3.9	0.019	Angiosperms	137.821	4.3	null	0.11431
D7.47	Common box (Buxus sempervirens)	7.4	2.1	2.1	1.6	2	EXCELLENT	4.4	0.8	2.2	0.004	Angiosperms	1100	2.2	null	0.0584842
D7.48	Common box (Buxus sempervirens)	7	1.8	1.8	0.9	0.6	FAIR	1.5	0.3	2.6	0.004	Angiosperms	2666.67	1.6	null	0.042534
D7.6	Italian Buckthorn (Rhamnus alaternus)	3.9	2.5	2.5	1.8	2.5	EXCELLENT	5.2	0.2	2	0.001	Angiosperms	440	1.1	null	0.0292421
D7.8	Rose-of-sharon (Hibiscus syriacus)	8.5	2.5	2.1	1.8	2.7	EXCELLENT	7.6	0.4	2.8	0.006	Angiosperms	1518.52	4.1	null	0.108993
D7.9	Russian olive (Elaeagnus angustifolia)	14	4.6	4.6	4.6	16.3	EXCELLENT	51.6	2.7	3.2	0.015	Angiosperms	417.178	6.8	very poor	0.180769
D8.1	Glossy abelia (Abelia x grandiflora)	7.9	3.3	2.3	3.9	12.3	EXCELLENT	14.3	0.7	1.2	0.005	Angiosperms	373.984	4.6	null	0.122285
D8.4	Leather leaf viburnum (Viburnum rhytidophyllum)	20.7	4.1	2.5	4.1	13.5	EXCELLENT	24.7	1.3	1.8	0.034	Angiosperms	318.519	4.3	null	0.11431
D8.9	Dwarf honeysuckle (Lonicera xylosteum)	4.2	2	2	2.6	5.3	EXCELLENT	7.3	0.4	1.4	0.001	Angiosperms	415.094	2.2	null	0.0584842
G1.1	Deodar cedar (Cedrus deodara)	70.8	18.9	18.1	11.8	110.3	EXCELLENT	1177.4	276	10.7	0.394	Gymnosperms	264.733	29.2	good	0.776245
G1.2	Deodar cedar (Cedrus deodara)	74.8	22.5	22.5	14.8	170.9	EXCELLENT	1755.8	411.6	10.3	0.44	Gymnosperms	263.897	45.1	good	1.19893
G1.3	Atlas cedar (Cedrus atlantica)	40.4	9	6.7	6.9	37.4	EXCELLENT	116.6	27.3	3.1	0.128	Gymnosperms	449.198	16.8	poor	0.446607
G2.1	Deodar cedar (Cedrus deodara)	70	20	17.8	15.6	191.1	EXCELLENT	1014.7	237.9	5.3	0.385	Gymnosperms	151.753	29	good	0.770928
G2.10	Eastern white pine (Pinus strobus)	31.2	13.4	9.7	6.9	37.4	EXCELLENT	264.5	17	7.1	0.076	Gymnosperms	189.84	7.1	very poor	0.188744
G2.11	European silver fir (Abies alba)	32.6	15	14	4.8	18.5	EXCELLENT	182.6	25.7	9.9	0.083	Gymnosperms	345.946	6.4	very poor	0.170136
G2.12	Spanish fir (Abies pinsapo)	44.4	17.5	16.1	8.3	54.8	FAIR	639.3	90	11.7	0.155	Gymnosperms	80.292	4.4	null	0.116968
G2.13	Norway spruce (Picea abies)	42.2	16.9	16.2	7	37.9	GOOD	492	82	13	0.14	Gymnosperms	226.913	8.6	very poor	0.22862
G2.14	Norway spruce (Picea abies)	46.5	17.5	17.5	8.6	58.1	GOOD	830.3	138.4	14.3	0.17	Gymnosperms	135.972	7.9	very poor	0.210011
G2.15	Blue spruce (Picea pungens)	23.9	10.8	9.3	4.1	13.5	EXCELLENT	79.6	13.3	5.9	0.045	Gymnosperms	303.704	4.1	null	0.108993
G2.17	Nordmann fir (Abies nordmanniana)	5.9	3.5	3.5	2.3	4	EXCELLENT	10.2	1.4	2.6	0.003	Gymnosperms	300	1.2	null	0.0319005
G2.18	European silver fir (Abies alba)	26.1	13	10.4	4.6	16.6	GOOD	193.4	27.2	11.6	0.054	Gymnosperms	427.711	7.1	very poor	0.188744
G2.19	European silver fir (Abies alba)	8.6	4.7	4.7	2.9	6.6	EXCELLENT	19.9	2.8	3	0.006	Gymnosperms	363.636	2.4	null	0.0638009
G2.20	White spruce (Picea glauca)	10.7	4.2	4.2	3.4	9.1	EXCELLENT	27.4	4.4	3	0.009	Gymnosperms	153.846	1.4	null	0.0372172
G2.23	Oriental arborvitae (Platycladus orientalis)	13.8	3.6	3.6	3.7	10.8	GOOD	32.6	7.6	3	0.015	Gymnosperms	370.37	4	null	0.106335
G2.24	Oriental arborvitae (Platycladus orientalis)	7.7	3.4	3.4	2	3.3	CRITICAL	5.2	1.2	1.6	0.005	Gymnosperms	242.424	0.8	null	0.021267
G2.25	Oriental arborvitae (Platycladus orientalis)	6.4	2.5	2.5	2.4	4.7	FAIR	9.5	2.2	2	0.003	Gymnosperms	276.596	1.3	null	0.0345588
G2.26	Oriental arborvitae (Platycladus orientalis)	18.5	2.2	2.2	4	12.6	GOOD	26.6	6.2	2.1	0.027	Gymnosperms	444.444	5.6	very poor	0.148869
G2.27	Italian Buckthorn (Rhamnus alaternus)	9.7	5	5	3.8	11.3	EXCELLENT	32.8	1.5	2.9	0.007	Gymnosperms	318.584	3.6	null	0.0957014
G2.3	Austrian pine (Pinus nigra)	43	15.9	8.5	6.9	36.9	GOOD	277.1	26.7	7.5	0.145	Gymnosperms	186.992	6.9	very poor	0.183428
G2.4	Austrian pine (Pinus nigra)	39.8	14.5	10	6.7	34.7	GOOD	318.1	30.7	9.2	0.124	Gymnosperms	224.784	7.8	very poor	0.207353
G2.5	Aleppo pine (Pinus halepensis)	59.2	19.5	13.3	7.5	44.2	GOOD	662	63.8	15	0.275	Gymnosperms	488.688	21.6	acceptable	0.574208
G2.7	Atlas cedar (Cedrus atlantica)	53.8	19	13.7	8.4	55.4	EXCELLENT	424.5	99.5	7.7	0.227	Gymnosperms	301.444	16.7	poor	0.443948
G3.1	Greek Fir (Abies cephalonica)	39.8	16.6	15.4	7.3	41.9	GOOD	536.5	75.6	12.8	0.124	Gymnosperms	176.611	7.4	very poor	0.19672
G3.10	Turkish pine (Pinus brutia)	76.7	19.9	18.8	7.9	49	FAIR	627.3	60.5	12.8	0.462	Gymnosperms	453.061	22.2	acceptable	0.590159
G3.11	Turkish pine (Pinus brutia)	63.2	20.4	14.6	11.8	110.3	FAIR	742.4	71.6	6.7	0.314	Gymnosperms	159.565	17.6	poor	0.467874
G3.12	Austrian pine (Pinus nigra)	22.6	11.1	10.4	3.8	11.6	EXCELLENT	180	17.3	15.5	0.04	Gymnosperms	258.621	3	null	0.0797512
G3.14	Maritime pine (Pinus pinaster)	7.3	3.2	3.2	1.8	2.5	EXCELLENT	8	0.8	3.1	0.004	Gymnosperms	600	1.5	null	0.0398756
G3.15	Gray pine (Pinus sabiniana)	11.8	4	4	3.4	8.8	EXCELLENT	25.8	2.5	2.9	0.011	Gymnosperms	170.455	1.5	null	0.0398756
G3.16	Coulter pine (Pinus coulteri)	5.4	2.7	2	1.6	2	EXCELLENT	4.7	0.5	2.3	0.002	Gymnosperms	300	0.6	null	0.0159502
G3.17	Bhutan pine (Pinus wallichiana)	10.2	5.7	5.7	4	12.9	EXCELLENT	47.7	4.6	3.7	0.008	Gymnosperms	131.783	1.7	null	0.0451923
G3.2	Greek Fir (Abies cephalonica)	39.8	15.8	15.8	6.7	35.3	GOOD	425.9	60	12.1	0.124	Gymnosperms	218.13	7.7	very poor	0.204695
G3.20	Limber pine (Pinus flexilis)	7.6	3.9	3.4	2.4	4.5	EXCELLENT	11.9	1.1	2.6	0.005	Gymnosperms	155.556	0.7	null	0.0186086
G3.22	Italian cypress (Cupressus sempervirens)	27.6	13.4	13.2	1.1	1	EXCELLENT	14.7	3.4	14.2	0.06	Gymnosperms	13900	13.9	poor	0.369514
G3.3	Greek Fir (Abies cephalonica)	38.2	15.7	14.8	6.1	29.2	FAIR	318.3	44.8	10.9	0.115	Gymnosperms	198.63	5.8	very poor	0.154186
G3.4	Deodar cedar (Cedrus deodara)	14	5.3	5.3	3.5	9.9	GOOD	31.3	7.3	3.2	0.015	Gymnosperms	353.535	3.5	null	0.093043
G3.5	Prickly juniper (Juniperus oxycedrus)	17.7	4.3	4.3	4.9	18.5	GOOD	66.1	18.4	3.6	0.025	Gymnosperms	205.405	3.8	null	0.101018
G3.6	Port orford cedar (Chamaecyparis lawsoniana)	44.9	17.3	14.4	7.6	45.4	GOOD	665.3	166.3	14.7	0.158	Gymnosperms	259.912	11.8	poor	0.313688
G3.7	Oriental arborvitae (Platycladus orientalis)	31.3	7.1	7.1	5.1	20.4	EXCELLENT	143.1	33.5	7	0.077	Gymnosperms	490.196	10	very poor	0.265837
G3.8	Turkish pine (Pinus brutia)	63.3	17.2	13.5	10.9	93.3	GOOD	811.4	78.2	8.7	0.315	Gymnosperms	205.788	19.2	poor	0.510408
G3.9	Turkish pine (Pinus brutia)	61.8	18.1	15.7	9.2	65.8	FAIR	716	69	10.9	0.3	Gymnosperms	199.088	13.1	poor	0.348247
G4.10	Italian cypress (Cupressus sempervirens)	54.2	14.6	14.1	2.8	6.4	EXCELLENT	105.4	24.7	16.5	0.231	Gymnosperms	93.75	0.6	null	0.0159502
G4.2	Mexican weeping pine (Pinus patula)	8.4	3.2	3.2	2.9	6.6	GOOD	14.1	1.4	2.1	0.006	Gymnosperms	287.879	1.9	null	0.0505091
G4.4	Torrey pine (Pinus torreyana)	8.6	3.5	3.1	2.2	4	EXCELLENT	10.3	1	2.6	0.006	Gymnosperms	500	2	null	0.0531675
G4.5	Chinese Pine (Pinus tabuliformis)	5.1	2.5	2	2.5	4.9	EXCELLENT	7.6	0.7	1.5	0.002	Gymnosperms	163.265	0.8	null	0.021267
G4.7	Arizona cypress (Cupressus arizonica)	17.3	7.1	6.8	2.9	6.6	EXCELLENT	48.8	11.4	7.4	0.024	Gymnosperms	1318.18	8.7	very poor	0.231278
G4.8	Incense cedar (Calocedrus decurrens)	46.2	13.8	13.8	6.4	32.2	EXCELLENT	583.5	136.8	18.1	0.168	Gymnosperms	239.13	7.7	very poor	0.204695
G4.9	Common juniper (Juniperus communis)	4	2.4	2.4	1.7	2.3	EXCELLENT	5.8	1.6	2.6	0.001	Gymnosperms	391.304	0.9	null	0.0239254
G5.1	Incense cedar (Calocedrus decurrens)	49.3	15.7	15.7	7	38.5	EXCELLENT	692.7	162.4	18	0.191	Gymnosperms	215.584	8.3	very poor	0.220645
G5.10	Italian stone pine (Pinus pinea)	71.3	15.3	8.9	14.3	161.7	EXCELLENT	523	50.4	3.2	0.399	Gymnosperms	183.055	29.6	good	0.786878
G5.11	English yew (Taxus baccata)	14.6	4.6	3.6	2.1	3.5	EXCELLENT	12.3	1.5	3.6	0.017	Gymnosperms	971.429	3.4	null	0.0903847
G5.12	English yew (Taxus baccata)	7.9	3	3	1.6	2.1	EXCELLENT	7	0.8	3.3	0.005	Gymnosperms	523.81	1.1	null	0.0292421
G5.13	English yew (Taxus baccata)	8.2	3.4	3.4	1.1	1	EXCELLENT	5.4	0.6	5.7	0.005	Gymnosperms	1200	1.2	null	0.0319005
G5.14	English yew (Taxus baccata)	4.9	2.6	2.6	1.5	1.8	FAIR	3.9	0.5	2.2	0.002	Gymnosperms	277.778	0.5	null	0.0132919
G5.15	Incense cedar (Calocedrus decurrens)	35	7.6	6.6	6.3	31.2	GOOD	213.5	50	6.8	0.096	Gymnosperms	246.795	7.7	very poor	0.204695
G5.16	Oriental arborvitae (Platycladus orientalis)	22.4	7.9	7.9	6	28.3	GOOD	207.3	48.6	7.3	0.039	Gymnosperms	360.424	10.2	very poor	0.271154
G5.17	English yew (Taxus baccata)	8.9	2.3	1.5	2.2	3.8	EXCELLENT	7.1	0.8	1.9	0.006	Gymnosperms	342.105	1.3	null	0.0345588
G5.18	English yew (Taxus baccata)	8.9	2	1.1	2.6	5.5	EXCELLENT	8.5	1	1.5	0.006	Gymnosperms	236.364	1.3	null	0.0345588
G5.19	Oriental arborvitae (Platycladus orientalis)	23.2	6.4	6.4	6.1	29.2	EXCELLENT	148.1	34.7	5.1	0.042	Gymnosperms	380.137	11.1	very poor	0.295079
G5.2	Japanese yew (Taxus cuspidata)	14.4	5.9	5.9	2.9	6.4	EXCELLENT	33.5	4	5.3	0.016	Gymnosperms	453.125	2.9	null	0.0770928
G5.20	Italian stone pine (Pinus pinea)	72.9	14.8	6	12.7	126.7	EXCELLENT	584.1	56.3	4.6	0.418	Gymnosperms	239.148	30.3	good	0.805487
G5.21	Italian stone pine (Pinus pinea)	76.4	15.8	6.7	11.9	111.2	EXCELLENT	591.7	57	5.3	0.459	Gymnosperms	291.367	32.4	good	0.861313
G5.22	Japanese red cedar (Cryptomeria japonica)	13.4	5	4	4.8	17.7	EXCELLENT	50.6	2.9	2.9	0.014	Gymnosperms	242.938	4.3	null	0.11431
G5.3	Prickly juniper (Juniperus oxycedrus)	19.2	4.2	4.2	4.3	14.5	EXCELLENT	57.6	16	4	0.029	Gymnosperms	379.31	5.5	very poor	0.14621
G5.4	English yew (Taxus baccata)	9.4	3	3	3.2	8	EXCELLENT	16.4	1.9	2	0.007	Gymnosperms	175	1.4	null	0.0372172
G5.5	English yew (Taxus baccata)	9.6	3	3	3.7	11	EXCELLENT	20.6	2.4	1.9	0.007	Gymnosperms	127.273	1.4	null	0.0372172
G5.6	Italian stone pine (Pinus pinea)	73.8	16.2	8.4	11.7	107.5	GOOD	495.1	47.7	4.6	0.428	Gymnosperms	186.047	20	acceptable	0.531675
G5.8	Italian stone pine (Pinus pinea)	61.4	14.7	7.9	11.3	99.4	GOOD	428.1	41.3	4.3	0.296	Gymnosperms	165.996	16.5	poor	0.438631
G5.9	English yew (Taxus baccata)	22.4	5.4	5.4	7.7	46.6	GOOD	190.7	22.5	4.1	0.039	Gymnosperms	62.2318	2.9	null	0.0770928
G6.1	Oriental arborvitae (Platycladus orientalis)	22	4.9	3.9	4.5	16.3	EXCELLENT	65.8	15.4	4	0.038	Gymnosperms	638.037	10.4	very poor	0.276471
G6.13	Montezuma cypress (Taxodium mucronatum)	9.2	3.9	3.7	2.3	4.2	EXCELLENT	12.9	0.7	3.1	0.007	Gymnosperms	523.81	2.2	null	0.0584842
G6.14	Coast redwood (Sequoia sempervirens)	4.6	3.3	3.3	1.6	2	EXCELLENT	6.2	0.3	3.1	0.002	Gymnosperms	600	1.2	null	0.0319005
G6.15	Baldcypress (Taxodium distichum)	20.1	7.3	6.5	4.1	13.2	EXCELLENT	72.4	4.1	5.5	0.032	Gymnosperms	553.03	7.3	very poor	0.194061
G6.16	Monkeypuzzle tree (Araucaria araucana)	6.4	3.4	1.8	2.9	6.6	EXCELLENT	10.2	1.2	1.5	0.003	Gymnosperms	272.727	1.8	null	0.0478507
G6.2	Ginkgo (Ginkgo biloba)	11.3	6.7	4.5	2.9	6.8	EXCELLENT	19.4	1.9	2.8	0.01	Gymnosperms	161.765	1.1	null	0.0292421
G6.3	Ginkgo (Ginkgo biloba)	11.1	6.5	4.5	2.6	5.3	EXCELLENT	16.2	1.6	3	0.01	Gymnosperms	188.679	1	null	0.0265837
G6.4	Ginkgo (Ginkgo biloba)	16.2	7.6	4.3	3.9	11.6	EXCELLENT	39.6	3.8	3.4	0.021	Gymnosperms	155.172	1.8	null	0.0478507
G6.5	Yew podocarpus (Podocarpus macrophyllus)	4.3	2.8	2.8	0.9	0.6	EXCELLENT	1.9	0.2	3	0.001	Gymnosperms	1166.67	0.7	null	0.0186086
G6.8	English yew (Taxus baccata)	17.8	2.8	1.9	1.7	2.3	EXCELLENT	8.1	1	3.6	0.025	Gymnosperms	1826.09	4.2	null	0.111652
G6.9	English yew (Taxus baccata)	15	4.2	3.2	1.5	1.7	EXCELLENT	6.9	0.8	4.2	0.018	Gymnosperms	1411.76	2.4	null	0.0638009
O.D2.1	Olive (Olea europaea)	32.5	4.2	3.8	10.4	21.8	EXCELLENT	72.2	5.6	3.3	0.285	Angiosperms	1555.05	33.9	good	0.901188
O.D2.2	Olive (Olea europaea)	32.3	4	2.7	6.2	15	EXCELLENT	36	2.8	2.4	0.146	Angiosperms	1046.67	15.7	poor	0.417364
O.D2.3	Olive (Olea europaea)	58.7	4	3.1	5.3	22.1	EXCELLENT	78.6	6.1	3.6	0.271	Angiosperms	1194.57	26.4	acceptable	0.70181
O.D2.4	Olive (Olea europaea)	45.1	4.3	3.3	8.2	27	EXCELLENT	104.5	8.2	3.87037	0.251	Angiosperms	822.222	22.2	acceptable	0.590159
O.D3.1	Olive (Olea europaea)	52.5	5.2	4.2	5.8	26	EXCELLENT	131.9	10.2	5.1	0.217	Angiosperms	888.462	23.1	acceptable	0.614084
O.D3.2	Olive (Olea europaea)	38.4	5.2	3.1	9.1	23.6	EXCELLENT	89.5	6.9	3.8	0.208	Angiosperms	1016.95	24	acceptable	0.638009
O.D5.1	Olive (Olea europaea)	45	5.2	3.2	8.6	20.7	EXCELLENT	96.6	7.4	4.66667	0.394	Angiosperms	1690.82	35	good	0.93043
O.D5.2	Olive (Olea europaea)	43.6	5.2	4.2	7.6	23.4	EXCELLENT	101.4	7.9	4.33333	0.262	Angiosperms	995.726	23.3	acceptable	0.619401
O.D5.3	Olive (Olea europaea)	64.5	5.1	3.9	5.7	25.5	EXCELLENT	132.6	10.3	5.2	0.327	Angiosperms	745.098	19	poor	0.505091
O.D5.4	Olive (Olea europaea)	33.4	5.2	0.5	7.8	19.3	EXCELLENT	78	6.1	4.04145	0.169	Angiosperms	1139.9	22	acceptable	0.584842
O.D5.5	Olive (Olea europaea)	34.9	5	4	5.3	11	EXCELLENT	49.9	3.9	4.53636	0.165	Angiosperms	1563.64	17.2	poor	0.45724
O.D6.1	Olive (Olea europaea)	30.6	4.2	3.2	6.8	18.9	EXCELLENT	62	4.8	3.28042	0.138	Angiosperms	804.233	15.2	poor	0.404073
O.D6.10	Olive (Olea europaea)	38.5	5.4	3.8	9.8	19.7	EXCELLENT	93.6	7.3	4.75127	0.26	Angiosperms	1461.93	28.8	good	0.765611
O.D6.11	Olive (Olea europaea)	46.1	5.2	3.6	9.8	27.4	EXCELLENT	100.5	7.8	3.66788	0.264	Angiosperms	890.511	24.4	acceptable	0.648643
O.D6.12	Olive (Olea europaea)	46.2	4.4	2.7	3.5	9.3	EXCELLENT	28.6	2.2	3.1	0.168	Angiosperms	1462.37	13.6	poor	0.361539
O.D6.13	Olive (Olea europaea)	30.8	4.1	2.8	6.8	18.2	EXCELLENT	50.8	4	2.79121	0.118	Angiosperms	752.747	13.7	poor	0.364197
O.D6.14	Olive (Olea europaea)	32.9	4	2.8	2.5	4.9	EXCELLENT	13.8	1.1	2.8	0.085	Angiosperms	2530.61	12.4	poor	0.329638
O.D6.15	Olive (Olea europaea)	36.8	4.9	3.8	6.4	15.9	EXCELLENT	61.9	4.8	3.89308	0.169	Angiosperms	1088.05	17.3	poor	0.459898
O.D6.16	Olive (Olea europaea)	33.6	4.2	2.6	4	12.3	EXCELLENT	28.1	2.2	2.3	0.089	Angiosperms	1040.65	12.8	poor	0.340272
O.D6.17	Olive (Olea europaea)	24.8	4.1	2.1	3.6	10.5	EXCELLENT	25.1	1.9	2.4	0.048	Angiosperms	580.952	6.1	very poor	0.162161
O.D6.18	Olive (Olea europaea)	28.8	4.1	1.8	9.1	24.2	EXCELLENT	50.3	3.9	2.07851	0.139	Angiosperms	661.157	16	poor	0.42534
O.D6.19	Olive (Olea europaea)	36.3	4.4	2.4	4.5	16.3	EXCELLENT	39.6	3.1	2.4	0.104	Angiosperms	607.362	9.9	very poor	0.263179
O.D6.2	Olive (Olea europaea)	58.8	5	3	8.8	23.6	EXCELLENT	130.2	10.1	5.51695	0.512	Angiosperms	1724.58	40.7	good	1.08196
O.D6.20	Olive (Olea europaea)	36.3	5.1	1.8	9.2	25.3	EXCELLENT	54.1	4.2	2.13834	0.195	Angiosperms	782.609	19.8	acceptable	0.526358
O.D6.21	Olive (Olea europaea)	48.7	5.7	3.4	10.8	33.7	EXCELLENT	124.5	9.6	3.69436	0.286	Angiosperms	712.166	24	acceptable	0.638009
O.D6.22	Olive (Olea europaea)	20.7	4.6	1.9	3.1	3.8	EXCELLENT	13.2	1	3.47368	0.067	Angiosperms	2500	9.5	very poor	0.252545
O.D6.23	Olive (Olea europaea)	30.9	5.7	3.2	8.8	21.8	EXCELLENT	95.7	7.4	4.38991	0.187	Angiosperms	935.78	20.4	acceptable	0.542308
O.D6.24	Olive (Olea europaea)	27.7	4.4	2	6.8	12.2	EXCELLENT	37.1	2.8	3.04098	0.148	Angiosperms	1500	18.3	poor	0.486482
O.D6.25	Olive (Olea europaea)	27.8	4.5	3.3	6.7	17.1	EXCELLENT	53.7	4.2	3.14035	0.115	Angiosperms	789.474	13.5	poor	0.35888
O.D6.26	Olive (Olea europaea)	30.6	3.4	1.7	3.8	5.5	EXCELLENT	19.7	1.5	3.58182	0.106	Angiosperms	2254.55	12.4	poor	0.329638
O.D6.27	Olive (Olea europaea)	22	5	1.9	4.6	9	EXCELLENT	25.3	1.9	2.81111	0.067	Angiosperms	1055.56	9.5	very poor	0.252545
O.D6.3	Olive (Olea europaea)	39.2	5.5	4	9.6	24.9	EXCELLENT	105.8	8.2	4.249	0.288	Angiosperms	1236.95	30.8	good	0.818779
O.D6.5	Olive (Olea europaea)	41.4	5.4	3.9	10	26.5	EXCELLENT	116.7	9.1	4.40377	0.336	Angiosperms	1188.68	31.5	good	0.837387
O.D6.6	Olive (Olea europaea)	27.7	5	3.4	3.1	7.8	EXCELLENT	29.1	2.3	3.7	0.06	Angiosperms	1294.87	10.1	very poor	0.268496
O.D6.7	Olive (Olea europaea)	42.8	5.4	4.1	6.9	19.4	EXCELLENT	92.1	7.2	4.74742	0.233	Angiosperms	1386.6	26.9	acceptable	0.715102
O.D6.8	Olive (Olea europaea)	38.2	5.7	4.2	9.6	25.5	EXCELLENT	109.3	8.5	4.28627	0.255	Angiosperms	980.392	25	acceptable	0.664593
O.D6.9	Olive (Olea europaea)	23.9	3.7	1.7	4.4	7.5	EXCELLENT	21.5	1.6	2.86667	0.071	Angiosperms	1293.33	9.7	very poor	0.257862
O.D7.1	Olive (Olea europaea)	45	5.9	2.7	7	26.1	EXCELLENT	126.1	9.8	4.83142	0.177	Angiosperms	636.015	16.6	poor	0.44129
O.D7.10	Olive (Olea europaea)	50.8	4.8	2.7	7	20.3	EXCELLENT	71.3	5.6	3.51232	0.236	Angiosperms	995.074	20.2	acceptable	0.536991
O.D7.11	Olive (Olea europaea)	56.1	5.1	3.4	7.3	22.6	EXCELLENT	96.4	7.4	4.26549	0.31	Angiosperms	1097.35	24.8	acceptable	0.659276
O.D7.12	Olive (Olea europaea)	28	4.1	2.7	5.4	13.4	EXCELLENT	41.6	3.2	3.10448	0.089	Angiosperms	1067.16	14.3	poor	0.380147
O.D7.13	Olive (Olea europaea)	33.4	4.9	3.7	6.6	17.5	EXCELLENT	67.2	5.2	3.84	0.124	Angiosperms	800	14	poor	0.372172
O.D7.14	Olive (Olea europaea)	32.5	3.7	0.6	7.9	20.1	EXCELLENT	25.2	1.9	1.25373	0.174	Angiosperms	800.995	16.1	poor	0.427998
O.D7.15	Olive (Olea europaea)	26.5	4	1.4	8.4	20.9	EXCELLENT	53.1	4.1	2.54067	0.094	Angiosperms	645.933	13.5	poor	0.35888
O.D7.2	Olive (Olea europaea)	59.8	5.9	4.3	5.1	20	EXCELLENT	77.4	6	3.9	0.281	Angiosperms	1380	27.6	good	0.733711
O.D7.3	Olive (Olea europaea)	89.1	5.8	2.9	11.5	26.2	EXCELLENT	107.3	8.4	4.09542	0.814	Angiosperms	980.916	25.7	acceptable	0.683202
O.D7.4	Olive (Olea europaea)	43.9	5.1	3.1	5.6	12.7	EXCELLENT	47.6	3.7	3.74803	0.298	Angiosperms	1984.25	25.2	acceptable	0.66991
O.D7.5	Olive (Olea europaea)	53.3	4.9	3.4	5	19.6	EXCELLENT	86.2	6.7	4.4	0.223	Angiosperms	1198.98	23.5	acceptable	0.624718
O.D7.6	Olive (Olea europaea)	39.8	4.6	1.7	9.1	22.9	EXCELLENT	75.7	5.9	3.30568	0.234	Angiosperms	1056.77	24.2	acceptable	0.643326
O.D7.7	Olive (Olea europaea)	46.5	6.3	2.3	11.1	32.6	EXCELLENT	99.4	7.7	3.04908	0.374	Angiosperms	1033.74	33.7	good	0.895872
O.D7.8	Olive (Olea europaea)	33.7	4.8	2.4	10.2	26.8	EXCELLENT	86.6	6.8	3.23134	0.256	Angiosperms	985.075	26.4	acceptable	0.70181
O.D7.9	Olive (Olea europaea)	59.9	5.4	4	5.3	22.5	EXCELLENT	105.7	8.2	4.7	0.282	Angiosperms	1222.22	27.5	acceptable	0.731052
O.D8.1	Olive (Olea europaea)	34.6	3.9	2	3.9	6	EXCELLENT	16.8	1.3	2.8	0.141	Angiosperms	2933.33	17.6	poor	0.467874
O.D8.2	Olive (Olea europaea)	37.8	4	3.4	3.7	10.8	EXCELLENT	30.6	2.4	2.8	0.112	Angiosperms	1379.63	14.9	poor	0.396098
O.D8.3	Olive (Olea europaea)	10.5	4.1	2.1	6	9.5	EXCELLENT	25.3	1.9	2.66316	0.022	Angiosperms	557.895	5.3	very poor	0.140894
O.M.1	Olive (Olea europaea)	38.8	3.9	3	4.5	15.9	EXCELLENT	53	4.1	3.3	0.118	Angiosperms	968.553	15.4	poor	0.409389
O.M.2	Olive (Olea europaea)	40.7	3.7	2.7	6.3	16.1	EXCELLENT	50.8	4	3.15528	0.169	Angiosperms	1335.4	21.5	acceptable	0.57155
O.M.3	Olive (Olea europaea)	28.6	3.5	1	10	19.7	EXCELLENT	52.8	4	2.6802	0.215	Angiosperms	1294.42	25.5	acceptable	0.677885
O.M.4	Olive (Olea europaea)	34.1	4.3	2.6	10	26.9	EXCELLENT	76.2	5.8	2.83271	0.233	Angiosperms	914.498	24.6	acceptable	0.65396
O.M.5	Olive (Olea europaea)	36.4	4	2.1	10.2	40.6	EXCELLENT	97.6	7.6	2.40394	0.196	Angiosperms	465.517	18.9	poor	0.502432
O.M.6	Olive (Olea europaea)	42.3	3.8	2.1	7.2	23.9	EXCELLENT	79.6	6.2	3.33054	0.197	Angiosperms	778.243	18.6	poor	0.494457
O.M.7	Olive (Olea europaea)	30.2	3.2	1.5	8.8	22	EXCELLENT	43.2	3.3	1.96364	0.176	Angiosperms	1063.64	23.4	acceptable	0.622059
O.M.8	Olive (Olea europaea)	46.5	5.4	3.5	7.3	21.2	EXCELLENT	101.3	7.9	4.7783	0.259	Angiosperms	1075.47	22.8	acceptable	0.606109
S1.1	European turkey oak (Quercus cerris)	58.9	19.5	14.8	14.2	157.3	EXCELLENT	870.8	85.6	5.5	0.273	Angiosperms	205.976	32.4	good	0.861313
S1.2	European filbert (Corylus avellana)	4	1.9	1.6	2.3	4.2	EXCELLENT	4.5	0.3	1.1	0.001	Angiosperms	238.095	1	null	0.0265837
S1.3	European filbert (Corylus avellana)	5.1	2.4	1.9	2.4	4.5	EXCELLENT	7.6	0.5	1.7	0.002	Angiosperms	200	0.9	null	0.0239254
S1.4	Graham's manihot (Manihot grahamii)	12.1	3.3	1.6	3	7.3	EXCELLENT	10.7	1.9	1.5	0.011	Angiosperms	1739.73	12.7	poor	0.337613
S1.5	Earleaf nightshade (Solanum mauritianum)	11.8	3.7	3.2	5	20	EXCELLENT	44.9	3.6	2.2	0.011	Angiosperms	220	4.4	null	0.116968
S2.10	Mediterranean fan palm (Chamaerops humilis)	56.8	4.2	2.8	5.5	23.3	EXCELLENT	41.5	7	1.8	0.253	Angiosperms	4.29185	0.1	null	0.00265837
S2.13	Windmill palm (Trachycarpus fortunei)	19.7	5.3	2.8	3.1	7.5	EXCELLENT	8.8	1.5	1.2	0.03	Angiosperms	226.667	1.7	null	0.0451923
S2.2	Kiwi (Actinidia chinensis)	4.9	2.3	1.1	2.7	5.5	EXCELLENT	4.7	0.4	0.9	0.002	Angiosperms	545.455	3	null	0.0797512
S2.4	Moundlily yucca (Yucca gloriosa)	24.7	3.4	2.9	2.4	4.3	EXCELLENT	5.4	0.9	1.3	0.048	Angiosperms	2232.56	9.6	very poor	0.255204
S2.5	Castillon Bamboo (Phyllostachys reticulata)	2.9	2.7	2.7	3.1	7.8	EXCELLENT	4.9	0.8	0.6	0.001	Angiosperms	153.846	1.2	null	0.0319005
S2.6	Castillon Bamboo (Phyllostachys reticulata)	8.5	8.5	8.5	7.3	41.9	EXCELLENT	85.5	14.3	2	0.006	Angiosperms	88.3055	3.7	null	0.0983598
S2.6bis	Castillon Bamboo (Phyllostachys reticulata)	10.1	8.4	8.4	6.6	34.2	EXCELLENT	77.2	13	2.3	0.008	Angiosperms	90.6433	3.1	null	0.0824095
S2.7	Windmill palm (Trachycarpus fortunei)	22.9	6.4	1.7	2.1	3.6	EXCELLENT	4.6	0.8	1.3	0.041	Angiosperms	583.333	2.1	null	0.0558258
S2.8	Windmill palm (Trachycarpus fortunei)	27.1	6.7	2.3	3	7.1	EXCELLENT	9	1.5	1.3	0.058	Angiosperms	197.183	1.4	null	0.0372172
S2.9	Windmill palm (Trachycarpus fortunei)	23.6	6.2	1.1	1.7	2.3	EXCELLENT	3	0.5	1.3	0.044	Angiosperms	521.739	1.2	null	0.0319005
					total:	10078		64929.7	6551	6.44272	35.789		256400	3761.7		100
	mean	26.3166	7.47652	5.7279	5.38591	27.8398		179.364	18.0967	4.60342	0.0988646		708.287	10.3914
	median	22.15	4.95	3.5	4.45	13.7		47.3	4	3.2	0.039		434.286	6.1
	Interquartile range	32.3	8.525	6	5.275	30.65		200.25	19.475	3.1	0.162		686.418	14.575
	Min	2.5	1.8	0.5	0.9	0.6		1.2	0.1	0.6	0		4.29185	0.1
	Q1-1.5*Interquartile range	2.5	1.8	0.5	0.9	0.6		1.2	0.1	0.6	0		4.29185	0.1
	first quartile (Q1)	8.325	3.3	2.4	2.4	4.5		8.25	0.9	2.2	0.00525		226.728	2.1
	third quartile (Q3)	40.625	11.825	8.4	7.675	35.15		208.5	20.375	5.3	0.16725		913.146	16.675
	Q3+1.5*Interquartile range	89.075	24.1	17.4	15.5875	81.125		508.875	49.5875	9.95	0.41025		1942.77	38.5375
	max	89.1	24.1	22.5	15.6	191.1		1755.8	411.6	18.1	0.814		13900	76.3
